# Supplementary material for: Supramolecular Solid Complexes between Bis-pyridinium-4-oxime and Distinctive Cyanoiron Platforms
Source: MDPI journal article supplement (doi:10.3390/molecules29081698), 2024-04-09
Supplement: s1 [file s1]

# Supramolecular Solid Complexes between bis(Pyridinium-4-oxime) and Distinctive Cyanoiron Platforms

Igor Picek <sup>1</sup>, Dubravka Matković-Čalogović <sup>2</sup>, Goran Dražić <sup>3</sup>, Gregor Kapun <sup>3</sup>, Primož Šket <sup>3</sup>, Jasminka Popović <sup>4,\*</sup> and Blaženka Foretić <sup>1,\*</sup>

<sup>1</sup> Department of Chemistry and Biochemistry, School of Medicine, University of Zagreb, Šalata 3, HR-10000 Zagreb, Croatia; ipicek@mef.hr (I.P.); bforetic@mef.hr (B.F.);

<sup>2</sup> Department of Chemistry, Faculty of Science, University of Zagreb, Horvatovac 102a, HR-10000 Zagreb, Croatia; dubravka@chem.pmf.hr (D.M.Č.);

<sup>3</sup> National Institute of Chemistry, Hajdrihova 19, SLO-1001 Ljubljana, Slovenia; goran.drazic@ki.si (G.D.); gregor.kapun@ki.si (G.K.); primoz.sket@ki.si (P.S.)

<sup>4</sup> Division of Materials Physics, Ruđer Bošković Institute, Bijenička cesta 54, HR-10000 Zagreb, Croatia; Jasminka.Popovic@irb.hr (J.P.)

\*Correspondence: bforetic@mef.hr (B.F.); Jasminka.Popovic@irb.hr (J.P.)

Contents:

Figure S1: Thermal analysis trace for **1a**, **1b** and **1cr** in the stream of nitrogen.

Figure S2: UV-Vis-NIR diffuse-reflectance spectrum of **1cr**.

Figure S3: <sup>57</sup>Fe Mössbauer spectra of the **1b** relative to  $\alpha$ -Fe at 80 K (left) and RT (right).

Figure S4: IR spectra of TOXO-Cl, K-HCF · 3H<sub>2</sub>O and related IICT-complexes TOXO-HCF·3.5 H<sub>2</sub>O, **1cr**, and anhydrous TOXO-HCF, **1b** at RT.

Table S1: Crystal data and structure refinement for **1cr**.

Figure S5: Asymmetric unit of **1cr** with the atom labeling scheme. Ellipsoids are at the 30 % probability level.

Table S2: <sup>13</sup>C solid-state NMR chemical shifts for **1cr** and **1b** at RT.

Figure S6: View of **2** along the *c*-axis. Two double layers are colored in red and blue.

Table S3: Crystal data and structure refinement for **2**.

Figure S7: Asymmetric unit of **2** with the atom labeling scheme. Ellipsoids are at the 30 % probability level.

Assignment of bands in IR spectrum of TOXO-NP·2H<sub>2</sub>O (**2**) in correlation with Na-NP·2H<sub>2</sub>O at RT shown in Fig. 8b.

Figure S8:  $^{57}\text{Fe}$  Mössbauer spectra of **2** relative to  $\alpha\text{-Fe}$  at 80 K (left) and RT (right).

Figure S9: XRPD patterns of **2** measured and simulated from the crystal structure.

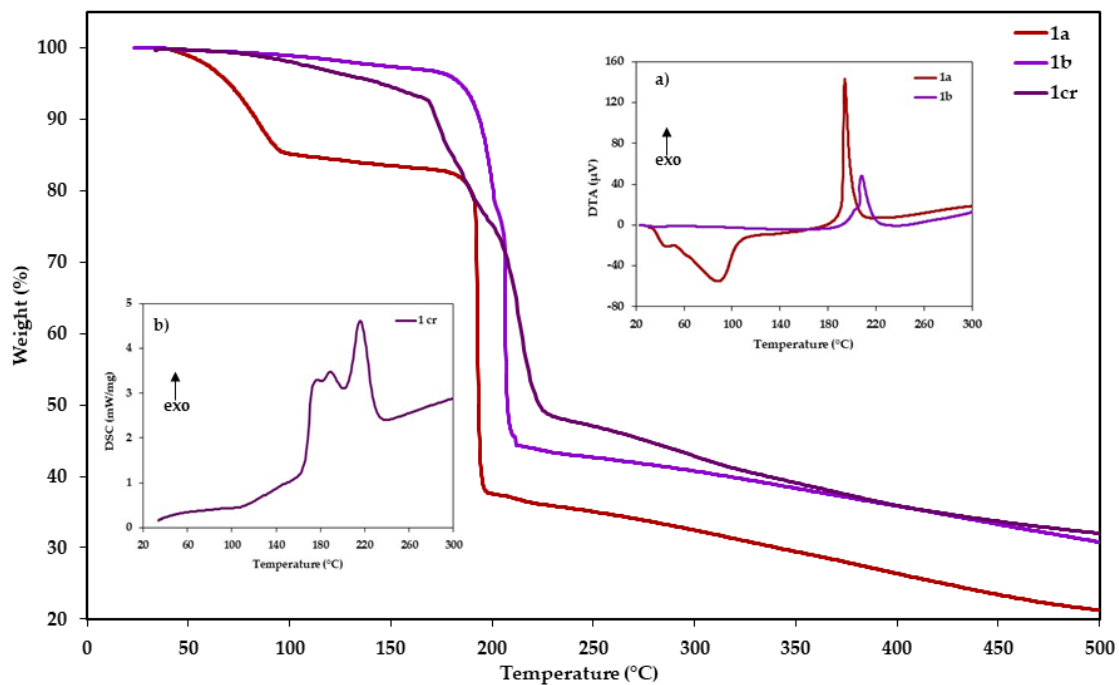

Figure S1. Thermal analysis trace for **1a**, **1b** and **1cr** in the stream of nitrogen.

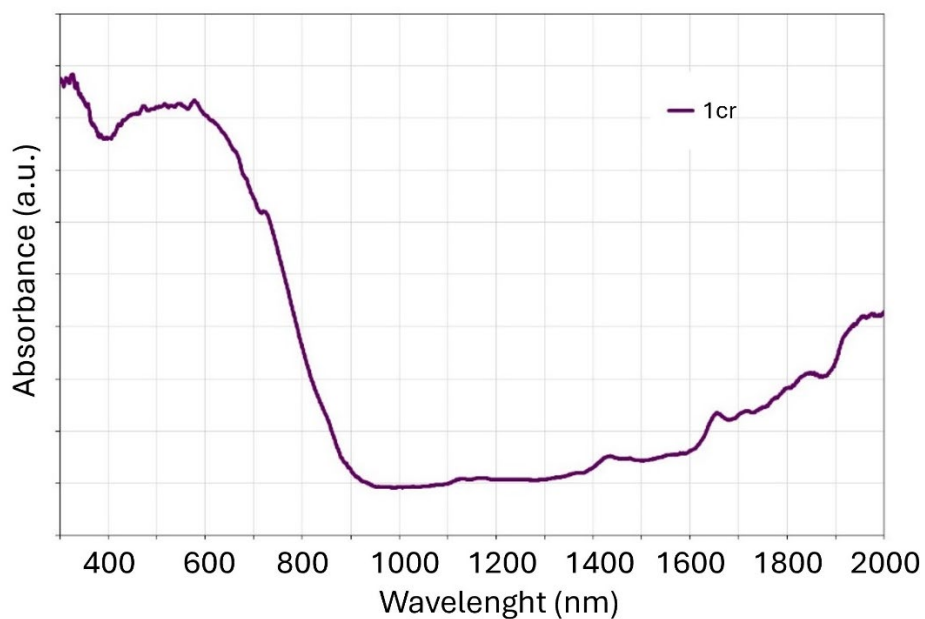

**Figure S2.** UV-Vis-NIR diffuse-reflectance spectrum of **1cr**.

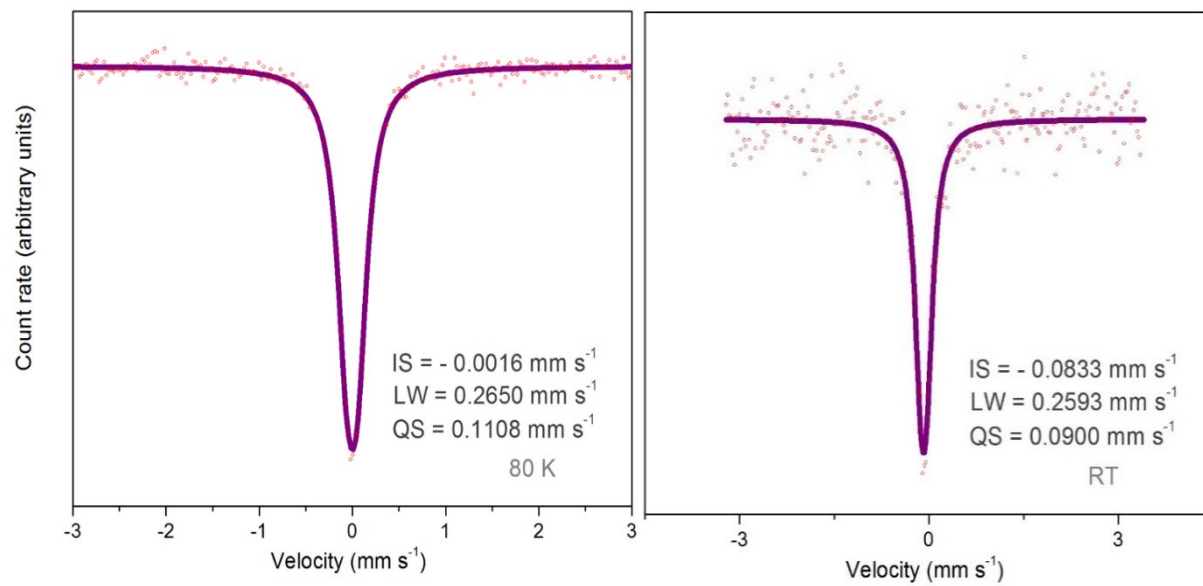

**Figure S3.** <sup>57</sup>Fe Mössbauer spectra of the **1b** relative to  $\alpha$ -Fe at 80 K (left) and RT (right).

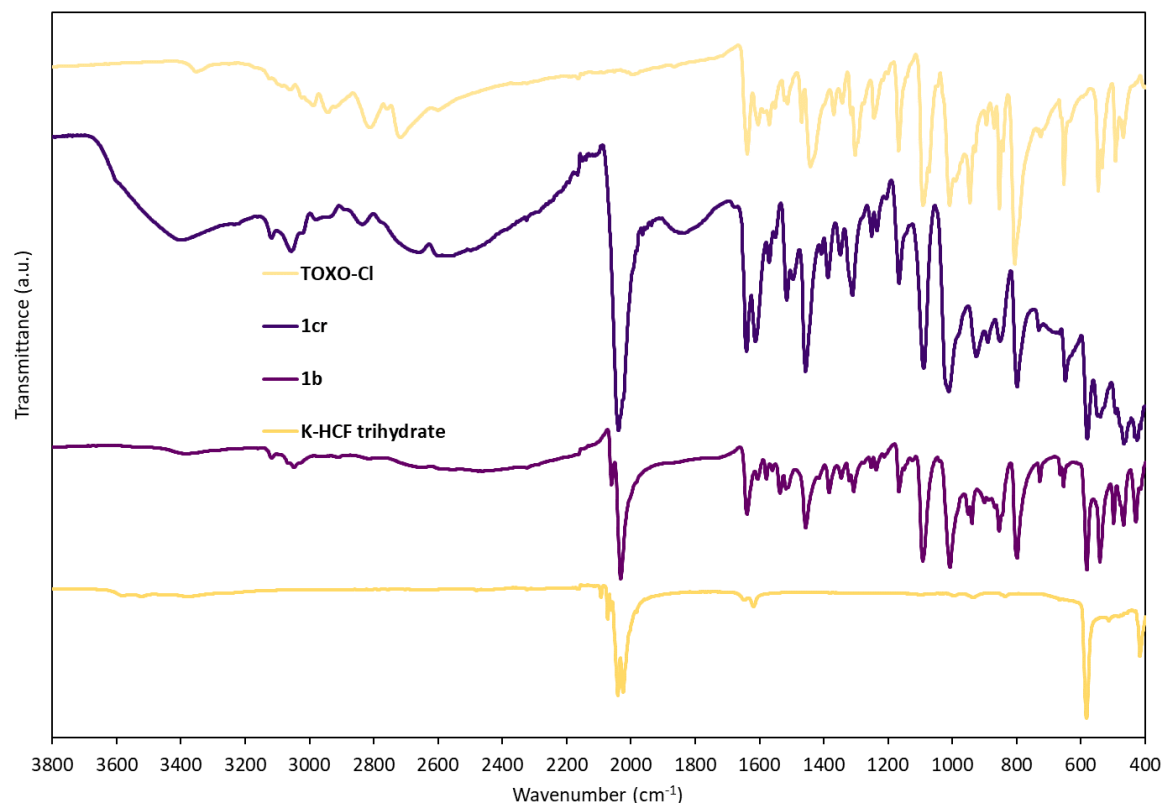

**Figure S4.** IR spectra of TOXO-Cl, K-HCF  $\cdot 3\text{H}_2\text{O}$  and related IICT-complexes TOXO-HCF $\cdot 3.5\text{H}_2\text{O}$ , **1cr**, and anhydrous TOXO-HCF, **1b** at RT.

TOXO-Cl:  $\nu(\text{O-H})_{\text{oxime}}$ , 3440 (m, br)  $\text{cm}^{-1}$ ;  $\nu(\text{C}_{\text{ring-H}})_{\text{pyridinium ring}}$ ,  $\nu_{\text{sym, asym}}(\text{CH}_2)_{\text{linker}}$  results in several medium and strong bands in the  $\sim 3300\text{--}2600\text{ cm}^{-1}$  region; the region  $\sim 1700\text{--}400\text{ cm}^{-1}$  contains mainly combination bands and the most prominent vibrations are  $\nu(\text{C=N})_{\text{oxime conjugated}}$  at 1645 (vs)  $\text{cm}^{-1}$ ,  $\nu(\text{CC, CN})_{\text{pyridinium ring}}$  at 1608 (vs)  $\text{cm}^{-1}$  and 1515 (s)  $\text{cm}^{-1}$ , than  $\nu(\text{C-O-C})_{\text{linker}}$  at 1089 (s)  $\text{cm}^{-1}$  and finally  $\nu(\text{NO})_{\text{oxime}}$  at 1007 (vs)  $\text{cm}^{-1}$ .

K-HCF $\cdot 3\text{H}_2\text{O}$ : broad and very weak  $\nu(\text{O-H})_{\text{water}}$  absorption bands are in the 3350–3600  $\text{cm}^{-1}$  region; in the  $\nu(\text{C}\equiv\text{N})_{\text{cyano}}$  stretching region several peaks are observed, two of them are very strong bands at 2072  $\text{cm}^{-1}$  and 2045  $\text{cm}^{-1}$  in position and by number typically found in the potassium HCF salts; two weak but well-defined  $\delta(\text{H-O-H})$  vibrations probably corresponding to two nonequivalent water molecules, are at 1649 and 1619  $\text{cm}^{-1}$  while strong bands at 583 and 420  $\text{cm}^{-1}$ , respectively are result of  $\delta(\text{Fe-C}\equiv\text{N})$  bending and  $\nu(\text{Fe-CN})$  stretching.

TOXO-HCF $\cdot n\text{H}_2\text{O}$  ( $n=3.5$  in **1cr**, and  $n=0$  in **1b**): the skeletal vibrations in TOXO and HCF moieties, i.e.  $\nu(\text{C=N})_{\text{oxime}}$  at  $\sim 1640$  (vs)  $\text{cm}^{-1}$ ,  $\nu(\text{CC, CN})_{\text{pyridinium ring}}$  at 1608 (vs)  $\text{cm}^{-1}$  and 1515 (s)  $\text{cm}^{-1}$  and  $\nu(\text{NO})_{\text{oxime}}$  at 999 (vs)  $\text{cm}^{-1}$ ;  $\nu(\text{C}\equiv\text{N})_{\text{cyano}}$  at 2038 (vs)  $\text{cm}^{-1}$  in **1cr** and in **1b** at

2060 (m)  $\text{cm}^{-1}$  and 2031(vs)  $\text{cm}^{-1}$ ;  $\delta(\text{Fe-C}\equiv\text{N})$  at 580 (s)  $\text{cm}^{-1}$  and  $\nu(\text{Fe-C})$  at 429 (m)  $\text{cm}^{-1}$  are preserved with only small shifts relative to their initial absorption frequencies. In **1cr** waters have broad  $\nu(\text{O-H})$  absorption band centred around 3400  $\text{cm}^{-1}$  and strong well-defined  $\delta(\text{H-O-H})$  vibration at 1619  $\text{cm}^{-1}$ . In **1b** effect of dehydration disrupts the site symmetry to the extent that two  $\nu(\text{C}\equiv\text{N})_{\text{cyano}}$  bands appear.

**Table S1.** Crystal data and structure refinement for **1cr**.

|                     |                                                                  |
|---------------------|------------------------------------------------------------------|
| Identification code | TOXO_HCF                                                         |
| Empirical formula   | $\text{C}_{34}\text{H}_{39}\text{N}_{14}\text{O}_{9.5}\text{Fe}$ |
| Formula weight      | 851.64                                                           |
| Temperature/K       | 150(1)                                                           |
| Crystal system      | monoclinic                                                       |
| Space group         | I2/a                                                             |
| a/Å                 | 17.2565(5)                                                       |
| b/Å                 | 22.4076(5)                                                       |
| c/Å                 | 20.7624(6)                                                       |

|                                                |                                                               |
|------------------------------------------------|---------------------------------------------------------------|
| $\alpha/^\circ$                                | 90                                                            |
| $\beta/^\circ$                                 | 104.051(3)                                                    |
| $\gamma/^\circ$                                | 90                                                            |
| Volume/ $\text{\AA}^3$                         | 7788.1(4)                                                     |
| Z                                              | 8                                                             |
| $\rho_{\text{calc}}/\text{g/cm}^3$             | 1.453                                                         |
| $\mu/\text{mm}^{-1}$                           | 0.461                                                         |
| F(000)                                         | 3544.0                                                        |
| Crystal size/ $\text{mm}^3$                    | $0.302 \times 0.230 \times 0.172$                             |
| Radiation                                      | Mo K $\alpha$ ( $\lambda = 0.71073$ )                         |
| 2 $\Theta$ range for data collection/ $^\circ$ | 8.162 to 54.998                                               |
| Index ranges                                   | $-21 \leq h \leq 22, -29 \leq k \leq 29, -20 \leq l \leq 26$  |
| Reflections collected                          | 34143                                                         |
| Independent reflections                        | 8899 [ $R_{\text{int}} = 0.0584, R_{\text{sigma}} = 0.0556$ ] |
| Data/restraints/parameters                     | 8899/1/544                                                    |
| Goodness-of-fit on $F^2$                       | 1.015                                                         |
| Final R indexes [ $I \geq 2\sigma(I)$ ]        | $R_1 = 0.0462, wR_2 = 0.0897$                                 |
| Final R indexes [all data]                     | $R_1 = 0.0708, wR_2 = 0.0991$                                 |
| Largest diff. peak/hole / $e \text{ \AA}^{-3}$ | 0.27/-0.38                                                    |

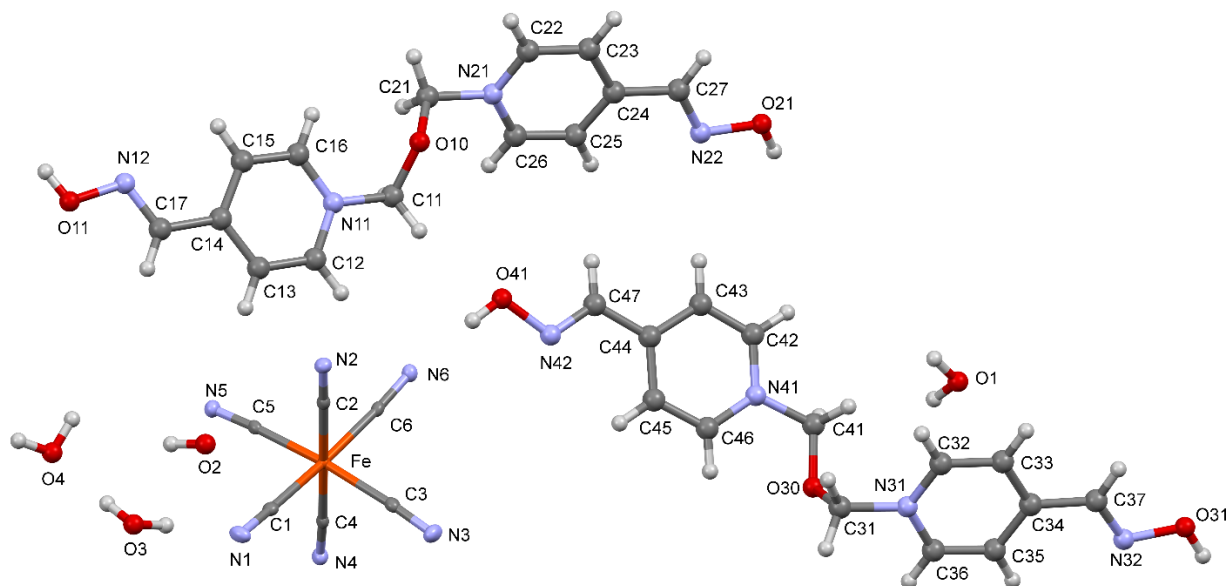

**Figure S5.** Asymmetric unit of **1cr** with the atom labeling scheme. Ellipsoids are at the 30 % probability level.

**Table S2.**  $^{13}\text{C}$  solid-state NMR chemical shifts for **1cr** and **1b** at RT.

|  |           |  |           |  |           |  |           |  |           |  |           |
|-----------------------------------------------------------------------------------|-----------|-----------------------------------------------------------------------------------|-----------|-----------------------------------------------------------------------------------|-----------|-----------------------------------------------------------------------------------|-----------|-------------------------------------------------------------------------------------|-----------|-------------------------------------------------------------------------------------|-----------|
| $\delta_{\text{iso}}/\text{ppm}$                                                  |           | $\delta_{\text{iso}}/\text{ppm}$                                                  |           | $\delta_{\text{iso}}/\text{ppm}$                                                  |           | $\delta_{\text{iso}}/\text{ppm}$                                                  |           | $\delta_{\text{iso}}/\text{ppm}$                                                    |           | $\delta_{\text{iso}}/\text{ppm}$                                                    |           |
| <b>1cr</b>                                                                        | <b>1b</b> | <b>1cr</b>                                                                        | <b>1b</b> | <b>1cr</b>                                                                        | <b>1b</b> | <b>1cr</b>                                                                        | <b>1b</b> | <b>1cr</b>                                                                          | <b>1b</b> | <b>1cr</b>                                                                          | <b>1b</b> |
| 78.1                                                                              | 78.1      | 119.7                                                                             | 119.7     | 144.3                                                                             | 144.3     | 147.6                                                                             | 147.8     | 151.1                                                                               | 151.0     | 158.8                                                                               | 158.9     |
| 84.5                                                                              | 84.5      | 122.0                                                                             | 123.7     |                                                                                   |           |                                                                                   |           |                                                                                     |           | 159.8                                                                               | 159.9     |
| 86.2                                                                              | 86.2      | 124.9                                                                             | 127.2     |                                                                                   |           |                                                                                   |           |                                                                                     |           | 168.5                                                                               | 178.2     |
| 88.0                                                                              | 90.0      | 127.1                                                                             | 129.0     |                                                                                   |           |                                                                                   |           |                                                                                     |           | 169.6                                                                               |           |
| 90.1                                                                              |           | 129.1                                                                             |           |                                                                                   |           |                                                                                   |           |                                                                                     |           | 173.8                                                                               |           |
| 94.2                                                                              |           | 131.0                                                                             |           |                                                                                   |           |                                                                                   |           |                                                                                     |           | 178.1                                                                               |           |

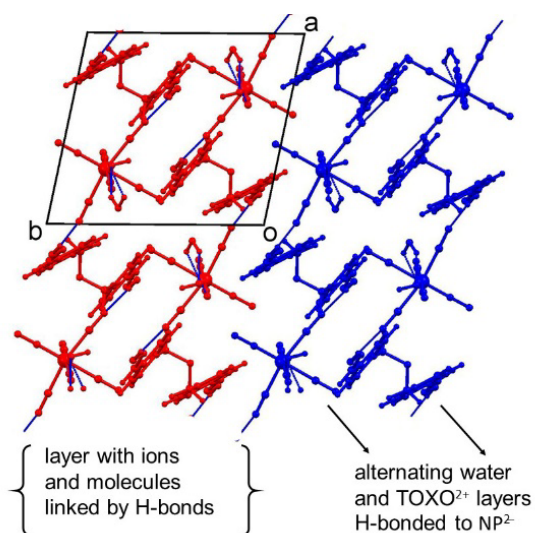

**Figure S6.** View of **2** along the  $c$ -axis. Two double layers are colored in red and blue.

**Table S3.** Crystal data and structure refinement for **2**.

|                     |                                                                  |
|---------------------|------------------------------------------------------------------|
| Identification code | TOXO_NP                                                          |
| Empirical formula   | C <sub>19</sub> H <sub>20</sub> FeN <sub>10</sub> O <sub>6</sub> |
| Formula weight      | 540.30                                                           |
| Temperature/K       | 293(2)                                                           |
| Crystal system      | triclinic                                                        |
| Space group         | P-1                                                              |
| a/Å                 | 10.3296(10)                                                      |
| b/Å                 | 11.0258(9)                                                       |
| c/Å                 | 12.1832(11)                                                      |
| $\alpha$ /°         | 103.230(7)                                                       |
| $\beta$ /°          | 110.695(9)                                                       |



|                                                |                                                               |
|------------------------------------------------|---------------------------------------------------------------|
| $\gamma/^\circ$                                | 95.886(7)                                                     |
| Volume/ $\text{\AA}^3$                         | 1237.68(19)                                                   |
| Z                                              | 2                                                             |
| $\rho_{\text{calc}}/\text{g}/\text{cm}^3$      | 1.450                                                         |
| $\mu/\text{mm}^{-1}$                           | 0.664                                                         |
| F(000)                                         | 556.0                                                         |
| Crystal size/ $\text{mm}^3$                    | $0.384 \times 0.326 \times 0.163$                             |
| Radiation                                      | Mo $K\alpha$ ( $\lambda = 0.71073$ )                          |
| $2\Theta$ range for data collection/ $^\circ$  | 8.538 to 58                                                   |
| Index ranges                                   | $-11 \leq h \leq 14, -15 \leq k \leq 14, -16 \leq l \leq 11$  |
| Reflections collected                          | 11207                                                         |
| Independent reflections                        | 6328 [ $R_{\text{int}} = 0.0359, R_{\text{sigma}} = 0.0731$ ] |
| Data/restraints/parameters                     | 6328/0/333                                                    |
| Goodness-of-fit on $F^2$                       | 0.995                                                         |
| Final R indexes [ $I \geq 2\sigma(I)$ ]        | $R_1 = 0.0555, wR_2 = 0.1038$                                 |
| Final R indexes [all data]                     | $R_1 = 0.1027, wR_2 = 0.1274$                                 |
| Largest diff. peak/hole / $e \text{ \AA}^{-3}$ | 0.37/-0.39                                                    |

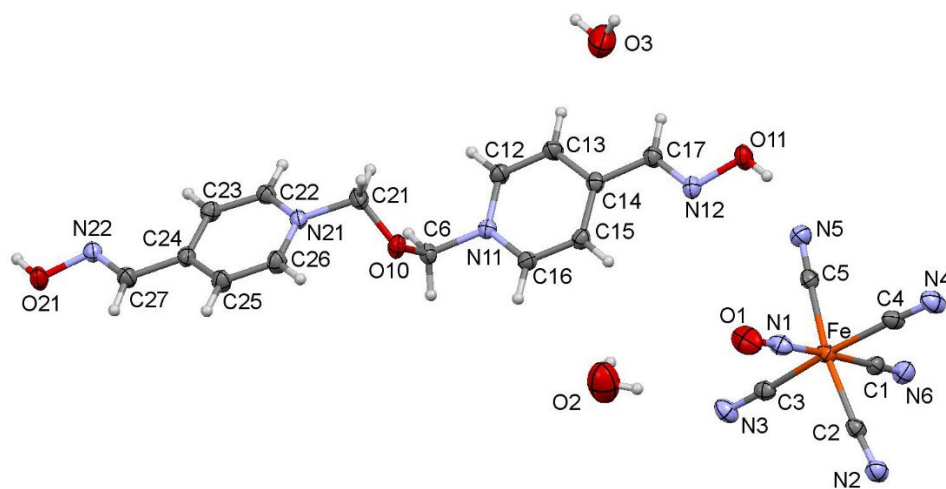

**Figure S7.** Asymmetric unit of **2** with the atom labeling scheme. Ellipsoids are at the 30 % probability level.

**Assignment of bands in IR spectrum of TOXO-NP·2H<sub>2</sub>O (2) in correlation with Na-NP·2H<sub>2</sub>O at RT shown in Fig. 8b.**

Na-NP·2H<sub>2</sub>O:  $\nu(\text{O-H})_{\text{water}}$  absorption bands at 3632 (vs)  $\text{cm}^{-1}$  and 3549 (vs)  $\text{cm}^{-1}$  (coordinated water); in the  $\nu(\text{C}\equiv\text{N})_{\text{cyano}}$  stretching region absorption bands at 2175 (m)  $\text{cm}^{-1}$ , 2157 (m)  $\text{cm}^{-1}$  and 2144 (s)  $\text{cm}^{-1}$  are observed partially due to a slightly distorted coordination environment of iron and are followed by  $\nu(\text{NO})_{\text{nitrosyl}}$  band at 1942 (vs)  $\text{cm}^{-1}$  (inset in Fig. 8b); the 1700–400  $\text{cm}^{-1}$  region contains  $\delta(\text{HOH})$  band at 1619 (vs)  $\text{cm}^{-1}$  and  $\delta(\text{Fe-NO}_{\text{nitrosyl}})$  at 663 (s)  $\text{cm}^{-1}$ , than  $\delta(\text{Fe-C}\equiv\text{N})$  at 651 (s)  $\text{cm}^{-1}$  and  $\nu(\text{Fe-C})$  at 423 (m-s)  $\text{cm}^{-1}$ .

TOXO-NP·2H<sub>2</sub>O: absorption bands at 3562 (br, s)  $\text{cm}^{-1}$  and 3452 (m) result from  $\nu(\text{OH})_{\text{water}}$  vibration and the latter is combination  $\nu(\text{OH})_{\text{water}}$  and  $\nu(\text{OH})_{\text{oxime}}$ , (broad absorption bands suggest hydrogen bonded water); two  $\nu(\text{CN})_{\text{cyano}}$  absorption bands appear at 2152 (s-vs)  $\text{cm}^{-1}$  and lower energy 2125 (s-vs)  $\text{cm}^{-1}$  indicate, besides the distorted coordination environment, the possibility of existence of CN-ligand free from any pertinent electrostatic interactions (axial CN-ligand) and is followed with the vibration  $\nu(\text{NO})_{\text{nitrosyl}}$  at 1935 (vs)  $\text{cm}^{-1}$  (inset in Fig. 8b); in the 1700–400  $\text{cm}^{-1}$  region absorption band at 1640 (vs)  $\text{cm}^{-1}$  is due to  $\nu(\text{C=N})_{\text{oxime}}$  while the band at 1618 (vs)  $\text{cm}^{-1}$  is a combination of  $\nu(\text{CN,CC})_{\text{pyridinium ring}}$  and  $\delta(\text{HOH})$ , followed by the  $\nu(\text{NO})_{\text{oxime}}$  at 1010 (vs)  $\text{cm}^{-1}$  and finally the deformation and stretching bands involving the iron i.e.  $\delta(\text{Fe-NO}_{\text{nitrosyl}})$  at 666 (s)  $\text{cm}^{-1}$ ,  $\delta(\text{Fe-C}\equiv\text{N})$  at 647 (s)  $\text{cm}^{-1}$  and  $\nu(\text{Fe-C})$  at 410 (m-s)  $\text{cm}^{-1}$ .

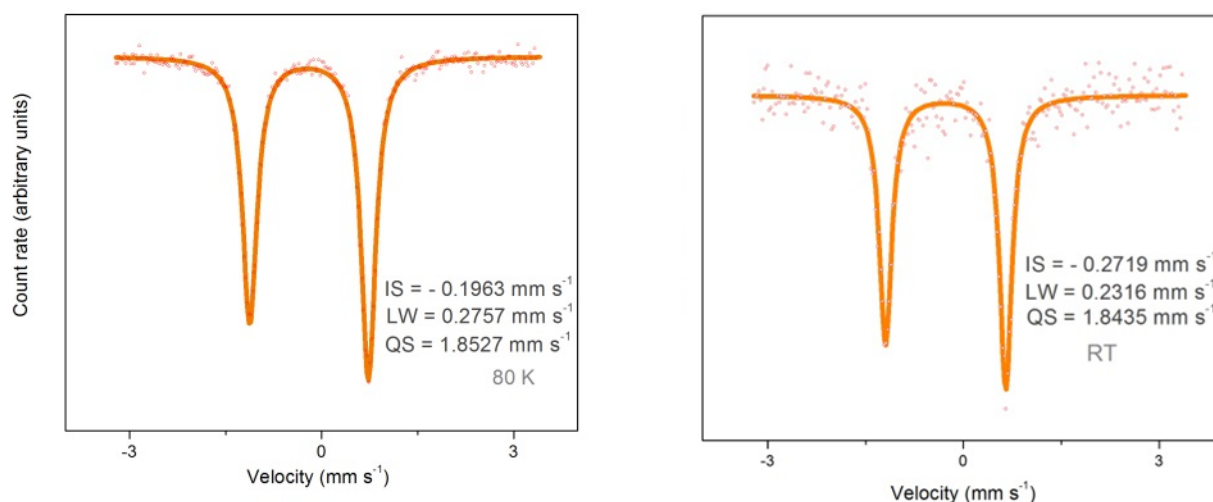

**Figure S8.**  $^{57}\text{Fe}$  Mössbauer spectra of **2** relative to  $\alpha\text{-Fe}$  at 80 K (left) and RT (right).

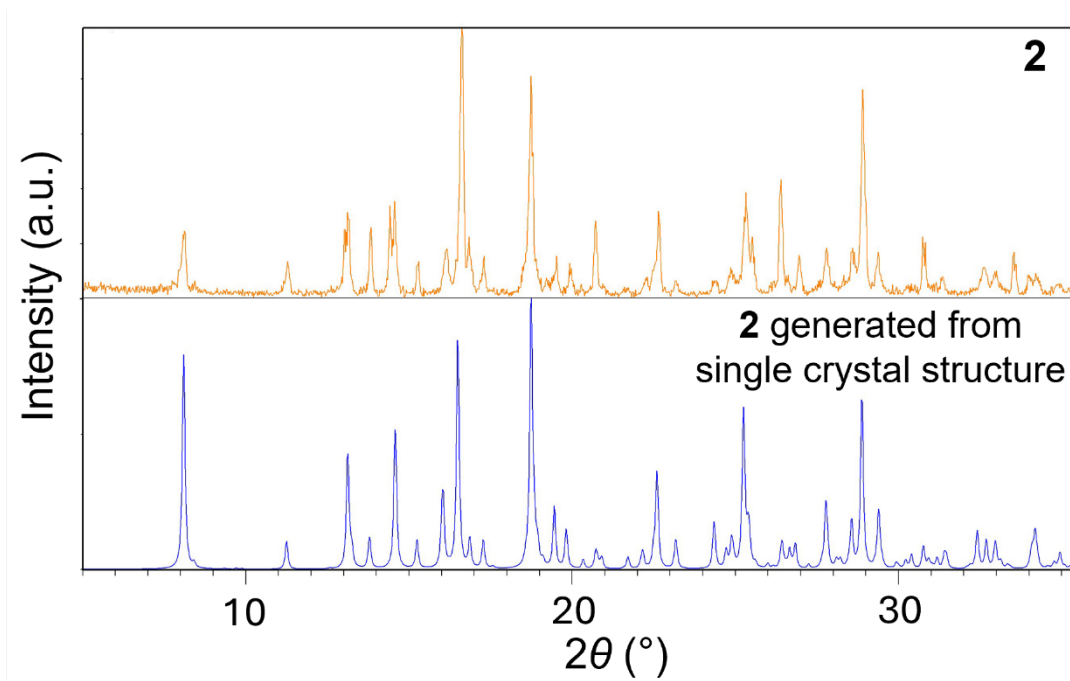

**Figure S9.** XRPD patterns of **2** measured and simulated from the crystal structure.
